# Supplementary material
Source: PubMed Central journal article supplement (PMC1914101)
Supplement: 7601753s1.pdf [file 7601753s1.pdf]

## **SUPPLEMENTARY FIGURE LEGENDS**

**Supplementary Figure 1:** ClustalW alignment the promoter sequences of the mouse (*Mus musculus*), rat (*Rattus norvegicus*), rhesus monkey (*Macaca mulatta*), and human (*Homo sapiens*) *Mixl1* gene shows extensive conservation in the region encompassing the putative Foxh1 binding site. The Foxh1 binding site is indicated above the sequence alignment, conserved nucleotides are indicated with \* and numbering relative to the start site are shown on the left.

**Supplementary Table 1: Primer sequences**

| <b>Primer Name</b>                          | <b>Sequence</b>                                                        |
|---------------------------------------------|------------------------------------------------------------------------|
| <b>Primers for reporter constructs</b>      |                                                                        |
| Mixl1For                                    | 5'-CCG <u>GAG CTC</u> ACG AAC CAA GCC CCC AAG-3'                       |
| Mixl1 Rev                                   | 5'-CCG <u>AGA TCT</u> GCC AGA CGC CGC GGG AAT-3'                       |
| Mixl1 mF For                                | 5'-AGG TAT TTA GAT TGG TGG TTG GAC-3'                                  |
| Mixl1 mF Rev                                | 5'-CCA CCA ATC TAA ATA CCT CGA ACC GC-3'                               |
| Mixl1 SBEm1 For                             | 5'-GGT GGT TGA ATT AGA TAT CGG ATG GGC GGG-3'                          |
| Mixl1 SBEm1 Rev                             | 5'-CCC ATC CGA TAT CTA ATT CAA CCA CCA ATC C-3'                        |
| Mixl1 SBEm2 For                             | 5'-TCG GAT GAG TGG AGA AGG GAC GGA-3'                                  |
| Mixl1 SBEm2 Rev                             | 5'-CTT CTC CAC TCA TCC GAT ATC TA-3'                                   |
| Mixl1 ΔSBE Rev                              | 5'-CCG <u>AGA TCT</u> ACC AAT CCA CAT ACC TCG-3'                       |
| <b>Primers for expression constructions</b> |                                                                        |
| Gsc fl For                                  | 5'-CCG <u>GTC GAC</u> CCC GCC AGC ATG TTC AGC-3'                       |
| Gsc fl Rev                                  | 5'-CCG <u>GGA TCC</u> TCT AGA TCA GCT GTC CGA GTC CAA ATC-3'           |
| Gsc 1-220 Rev                               | 5'-CCG <u>GGA TCC</u> TTA CTT CTG TCG TCT CCA CTT GGC TC-3'            |
| Gsc 1-143 Rev                               | 5'-CCG <u>GGA TCC</u> GCT CAC GTG CCC ACG TTC ATG TA-3'                |
| Gsc 1-116 Rev                               | 5'-CCG <u>GGA TCC</u> GCG GCC GCT CAC GTC GGG ACG CAG GAG CA-3'        |
| Gsc 1-96 Rev                                | 5'-CCG <u>CTG CAG</u> GCC CAC GGG CGC CGC CTG CAC-3'                   |
| Gsc 1-63 Rev                                | 5'-CCG <u>CTG CAG</u> AGC CGC GGC GCT GGG CGC CA-3'                    |
| Gsc Δ14 For                                 | 5'-CCG <u>GTC GAC</u> GC CGG CCG CGC TGC AAA GAC-3'                    |
| Gsc Δ81 For                                 | 5'-CCG <u>GTC GAC</u> AGC TAC TTC TAC GGG CAG-3'                       |
| Gsc Δ96 For                                 | 5' CCG <u>GTC GAC</u> GC CCG GCT TGC TGC GGG GCT-3'                    |
| Gsc Δ111 For                                | 5'-CCG <u>GTC GAC</u> GC TCC TGC GTC CCG ACG C-3'                      |
| Gsc Δ143 For                                | 5' - CCG <u>GTC GAC</u> GCC TGT CGC GCA CTG AGC TG-3'                  |
| Gsc HD For                                  | 5'-CCG <u>GTC GAC</u> GGA AGC GGC GGC ACC GCA CCA TC-3'                |
| Gsc HD Rev                                  | 5'-CCG <u>GGA TCC</u> TTA CCG CCG ACA GTG CAG CTG GTT-3'               |
| Gsc NG (N210G) For                          | 5'-CGC CGA GCC AAG TGG AGA CGA C-3'                                    |
| Gsc NG (N210G) Rev                          | 5'-TCT CCA CTT GGC TCG GCG GCC CTT AAA CCA GAC CTC-3'                  |
| Foxh1 ΔN For                                | 5'-CC GGT CGA CGC CAG CCT TAT CAG CCA CCC AG-3'                        |
| Foxh1 ΔN Rev                                | 5'-CCG TCT AGA <u>GGA TCC</u> TTA CAT GCT GTA CCA GGA AAG G-3'         |
| HDAC1 For                                   | 5'-CCG <u>GTC GAC</u> TGG CGC AGA CGC AGG GCA CC-3'                    |
| HDAC1 Rev                                   | 5'-CCG <u>GCG GCC GCG</u> GAT CCT TAG GCC AAC TTG ACC TCC TCC TTG A-3' |
| <b>DNA and Chromatin IP QPCR primers</b>    |                                                                        |
| Mixl1 ChIP/DNA IP For                       | 5'- GAG GTA TGT GGA TTG GTG GTT GGA-3'                                 |
| Mixl1 DNAIP Rev                             | 5'-CCG <u>AGA TCT</u> GCC AGA CGC CGC GGG AAT-3'                       |
| Mixl1 ChIP Rev                              | 5'-AAT GAG GGA GGC GCG AAC TTG A-3'                                    |
| Mixl1 ctl For                               | 5'-TGG CAG AGG ACA GTG ATG GAC AAA-3'                                  |
| Mixl1 ctl Rev                               | 5'-AAA CCA GCC TGA GAA GAC ACC AGA-3'                                  |

**Supplementary Table 1: Primer sequences**

| <b>Primer Name</b>                                                      | <b>Primer Sequence</b>                  |
|-------------------------------------------------------------------------|-----------------------------------------|
| <b>QPCR primers for mRNA expression studies using SYBR Green method</b> |                                         |
| Mix11 cDNA For                                                          | 5'-AAC CGA CGG GCC AAG TC-3             |
| Mix11 cDNA Rev                                                          | 5'-TCC CCG CCT TGA GGA TAA G-3'         |
| Hprt For                                                                | 5'-AAA CAA TGC AAA CTT TGC TTT CC-3'    |
| Hprt Rev                                                                | 5'-GGT CCT TTT CAC CAG CAA GCT-3'       |
| <b>Genotyping Primers</b>                                               |                                         |
| NeoF2                                                                   | 5'-GAG GAT CTC GTC GTG ACC CAT GG-3'    |
| GF1                                                                     | 5'-CAG ATG CTG CCC TAC ATG AAC GTG G-3' |
| GR1                                                                     | 5'-GGC GTT TTC TGA CTC CTC CGA GG-3'    |
